# Supplementary material
Source: PubMed Central journal article supplement (PMC3374668)
Supplement: supp_jn.112.158295_nut158295-ST1.pdf [file supp_jn.112.158295_nut158295-ST1.pdf]

## ON LINE SUPPORTING MATERIAL

Supplemental Table 1. Variables Associated with Changes in HDL and non-HDL Cholesterol Levels between 1999 and 2006 (N=291)

|                                                   | Estimate | SE   | P-value | 95% CI |        |
|---------------------------------------------------|----------|------|---------|--------|--------|
|                                                   |          |      |         | Lower  | Upper  |
| NonHDL-Cholesterol, R-squared = 0.61              |          |      |         |        |        |
| Sex (Male) <sup>1</sup>                           | -13.88   | 2.93 | <0.0001 | -19.65 | -8.11  |
| Age (10 years) <sup>1</sup>                       | -3.19    | 1.58 | 0.0440  | -6.30  | -0.09  |
| Baseline non-HDL Cholesterol, mmol/L <sup>1</sup> | -0.31    | 0.05 | <0.0001 | -0.40  | -0.22  |
| Started Statins                                   | -46.02   | 3.88 | <0.0001 | -53.65 | -38.39 |
| Stopped Statins                                   | 22.67    | 6.62 | 0.0007  | 9.65   | 35.69  |
| Change in Triglycerides (1 SD = 1 mmol/L)         | 6.63     | 2.18 | 0.0026  | 2.34   | 10.93  |
| Change in BMI (1 kg/m <sup>2</sup> )              | 1.94     | 0.72 | 0.0075  | 0.52   | 3.36   |
| HDL-Cholesterol, R-squared = 0.15                 |          |      |         |        |        |
| Sex (Male) <sup>1</sup>                           | -1.03    | 1.31 | 0.43    | -3.61  | 1.54   |
| Age (10 years) <sup>1</sup>                       | -0.30    | 0.61 | 0.63    | -1.50  | 0.91   |
| Baseline HDL Cholesterol, mmol/L <sup>1</sup>     | -0.12    | 0.04 | 0.0013  | -0.19  | -0.05  |
| Change in Triglycerides (1 SD = 1 mmol/L)         | -2.44    | 0.85 | 0.0046  | -4.12  | -0.76  |
| New diagnosis of diabetes                         | -6.67    | 2.53 | 0.0088  | -11.65 | -1.69  |
| Change in BMI (1 kg/m <sup>2</sup> )              | -0.74    | 0.29 | 0.0098  | -1.31  | -0.18  |

<sup>1</sup>Forced into multivariable linear regression model.
